# Supplementary material for: Teaching genetics prior to teaching evolution improves evolution understanding but not acceptance
Source: PLoS Biol. 2017 May 23;15(5):e2002255. doi: 10.1371/journal.pbio.2002255 (PMC5441579; doi:10.1371/journal.pbio.2002255)
Supplement: S1 Data — (XLSX) [file pbio.2002255.s010.xlsx]

## Sheet: Data Summary
School Code	Students	Pre	Post	Retention	Totals
10101	22	21	13	16	50
10102	20	19	19	16	54
10201	30	27	18	11	56
30201	23	21	23		44
10301	16	13	12		25
10302	32	31	28		59
10401	25	24	25		49
10402	29	28	25		53
10403	28	26	27		53
10404	28	25	22		47
10501	36	29	32		61
10502	30	30	28		58
20501	30	30	15		45
20502	28	28			28
20503	22	22			22
20504	18	18	16		34
30501	31	31	29		60
10601	32	30	29	28	87
10602	25	25			25
10603	22	18	18		36
20601	25	25			25
10701	31	29	27		56
10702	26	21	25		46
10703	29	28	27		55
10704	14	14	11		25
10801	33	29	30	26	85
10802	33	31	30	29	90
10803	17	15	13	6	34
10804	5			5	5
10805	4			4	4
20801	27	25	27		52
20802	25	25	24		49
20901	25	25	24	22	71
20902	32	19	20	10	49
20903	26	24	25		49
30901	16	16	14		30
30902	23	23	22		45
31201	21	19	15		34
31202	24	19	21		40
31203	20	19	19		38
31204	32	31	29		60
31205	21	20	20		40
31206	23	17	20		37
31207	19	19	15		34
31208	30	29	26		55
31401	32	31	30		61
31402	19	18	19		37
31701	20	20	13		33
31702	22	22	21		43
31801	23	23	23	19	65
31802	23	21	21	20	62
31901	28	27	27	23	77
31902	25	22	23	20	65
31903	28	28	27	28	83
32001	15	14	15		29
32002	13	12	11		23
32301	18	18	13		31
32302	15	14	14		28
32401	23	22	20		42
32402	31	27	29		56
32403	26	18	15		33
32501	30	30	27		57
32502	30	28	30		58
32503	28	27	26		53
32504	30	27	27		54
32701	33	31	31		62
32702	30	28	20		48
32703	31	25	18		43
32704	26	22	19		41
32801	7	6	5		11
32802	5	5	4		9
32803	5	5	5		10
32901	31	29	31		60
32902	26	24	21		45
33001	26	24	23	21	68
33002	28	27	27	25	79
33101	15	6	9		15
33102	36	17	20		37
Totals	1886	1716	1527	329	3572

## Sheet: Variables
Class	Ability	Set	School_Year_(Age)	Exam_Board	School	Teacher	Normal_Topic_Order	Actual_Topic_Order	Consecutive?	Pre?	Post?	Retention?
10101	H	Triple	Year 10	AQA	1	1,1	Genetics_first	Evolution_first	Yes	Y	Y	Y
10102	H	Triple	Year 10	AQA	1	1,1	Genetics_first	Genetics_first	Yes	Y	Y	Y
10201	H	Triple	Year 10	AQA	2	2,1	Genetics_first	Genetics_first	Yes	Y	Y	Y
10301	F	Lower	Year 9	AQA	3	3,1	Genetics_first	Genetics_first	Yes	Y	Y	N
10302	H	Triple	Year 10	AQA	3	3,1	Genetics_first	Genetics_first	Yes	Y	Y	N
10401	H	Triple	Year 10	OCR A 21st C	4	4,1	Genetics_first	Genetics_first	No (6-12 months for module inbetween)	Y	Y	N
10402	H	Triple	Year 10	OCR A 21st C	4	4,2	Genetics_first	Genetics_first	No (6-12 months for module inbetween)	Y	Y	N
10403	H	Higher	Year 10	OCR A 21st C	4	4,3	Genetics_first	Genetics_first	No (6-12 months for module inbetween)	Y	Y	N
10404	H	Higher	Year 10	OCR A 21st C	4	4,4 (Yr 1) 4,1 (Yr 2)	Genetics_first	Genetics_first	No (6-12 months for module inbetween)	Y	Y	N
10501	H	Higher	Year 11	Edexcel	5	5,1	Genetics_first	Genetics_first	Yes	Y	Y	N
10502	H	Higher	Year 11	Edexcel	5	5,2	Genetics_first	Genetics_first	Yes	Y	Y	N
10601	H	Triple	Year 10	AQA	6	6,1	Genetics_first	Genetics_first	Yes	Y	Y	Y
10602	H	Triple	Year 11	AQA	6	6,2	Genetics_first	Genetics_first	Yes	Y	N	N
10603	H	Triple	Year 11	AQA	6	6,3	Genetics_first	Genetics_first	Yes	Y	Y	N
10701	H	Higher	Year 9	Upd8 Segue/AQA	7	7,1	Varied_within_schoool	Evolution_first	Yes	Y	Y	N
10702	H	Higher	Year 9	Upd8 Segue/AQA	7	7,2	Varied_within_schoool	Evolution_first	Yes	Y	Y	N
10703	H	Higher	Year 9	Upd8 Segue/AQA	7	7,2	Varied_within_schoool	Evolution_first	Yes	Y	Y	N
10704	F	Lower	Year 9	Upd8 Segue/AQA	7	7,3	Varied_within_schoool	Evolution_first	Yes	Y	Y	N
10801	H	Triple	Year 10	AQA	8	8,1	Genetics_first	Evolution_first	Yes	Y	Y	Y
10802	H	Triple	Year 10	AQA	8	8,2	Genetics_first	Genetics_first	Yes	Y	Y	Y
10803	F	Double	Year 10	AQA	8	8,2	Genetics_first	Genetics_first	Yes	Y	Y	Y
10804	F	Double	Year 10	AQA	8	8,1	Genetics_first	Genetics_first	Yes	N	N	Y
10805	F	Double	Year 10	AQA	8	8,3	Genetics_first	Genetics_first	Yes	N	N	Y
20501	H	High	Year 11	Edexcel IGCSE	5	5,1	Evolution_first	Evolution_first	Yes	Y	Y	N
20502	H	Middle	Year 11	Edexcel IGCSE	5	5,3	Evolution_first	Evolution_first	Yes	Y	N	N
20503	F	Lower	Year 11	Edexcel IGCSE	5	5,1	Evolution_first	Evolution_first	Yes	Y	N	N
20504	F	Lower	Year 11	Edexcel IGCSE	5	5,1	Evolution_first	Evolution_first	Yes	Y	Y	N
20601	H	Triple	Year 10	AQA	6	6,1	Genetics_first	Genetics_first	Yes	Y	N	N
20801	H	Triple	Year 10	AQA	8	8,4	Genetics_first	Genetics_first	Yes	Y	Y	N
20802	H	Triple	Year 10	AQA	8	8,1	Genetics_first	Evolution_first	Yes	Y	Y	N
20901	H	Triple	Year 10	OCR Gateway	9	9,1	Genetics_first	Genetics_first	Gap between (different modules)	Y	Y	Y
20902	H	Triple	Year 10	OCR Gateway	9	9,2	Genetics_first	Genetics_first	Gap between (different modules)	Y	Y	Y
20903	F	Foundation	Year 10	OCR Gateway	9	9,3	Genetics_first	Genetics_first	Gap between (different modules)	Y	Y	N
30201	H	Middle	Year 10	AQA	2	2,1	Genetics_first	Genetics_first	Yes	Y	Y	N
30501	H	Higher (top set)	Year 10	AQA	5	5,4	Genetics_first	Genetics_first	Yes	Y	Y	N
30901	H	Triple	Year 10	OCR Gateway	9	9,4	Genetics_first	Genetics_first	Gap between (different modules)	Y	Y	N
30902	H	Triple	Year 10	OCR Gateway	9	9,3	Genetics_first	Genetics_first	Gap between (different modules)	Y	Y	N
31201	F	Mid-low	Year 9	Edexcel	12	12,1	Evolution_first	Evolution_first	Yes	Y	Y	N
31202	F	Very mixed	Year 9	Edexcel	12	12,2	Evolution_first	Evolution_first	Yes	Y	Y	N
31203	F	Mixed	Year 9	Edexcel	12	12,3	Evolution_first	Evolution_first	Yes	Y	Y	N
31204	H	Higher	Year 9	Edexcel	12	12,4	Evolution_first	Evolution_first	Yes	Y	Y	N
31205	F	Mixed	Year 9	Edexcel	12	12,3	Evolution_first	Evolution_first	Yes	Y	Y	N
31206	F	Middle	Year 9	Edexcel	12	12,3	Evolution_first	Evolution_first	Yes	Y	Y	N
31207	F	Mixed	Year 9	Edexcel	12	12,2	Evolution_first	Evolution_first	Yes	Y	Y	N
31208	H	Higher	Year 9	Edexcel	12	12,1	Evolution_first	Evolution_first	Yes	Y	Y	N
31401	H	Triple	Year 10	AQA	14	14,1	Genetics_first	Genetics_first	Yes	Y	Y	N
31402	H	Double	Year 10	AQA	14	14,2	Genetics_first	Genetics_first	Yes	Y	Y	N
31701	H	Top set	Year 11	Edexcel IGCSE	17	17,1	Genetics_first	Genetics_first	Yes	Y	Y	N
31702	H	Top set	Year 11	Edexcel IGCSE	17	17,2	Genetics_first	Genetics_first	Yes	Y	Y	N
31801	H	Triple	Year 10	AQA	18	18,1	Genetics_first	Evolution_first	Yes	Y	Y	Y
31802	H	Triple	Year 10	AQA	18	18,1	Genetics_first	Genetics_first	Yes	Y	Y	Y
31901	H	Top set	Year 9	Edexcel IGCSE	19	19,1	Evolution_first	Genetics_first	Yes	Y	Y	Y
31902	H	Higher ability	Year 9	Edexcel IGCSE	19	19,1	Evolution_first	Evolution_first	Yes	Y	Y	Y
31903	H	Triple (top set)	Year 10	Edexcel IGCSE	19	19,1	Evolution_first	Evolution_first	Yes	Y	Y	Y
32001	F	Lower (4/5)	Year 11	Edexcel IGCSE	20	20,1	Evolution_first	Genetics_first	Yes	Y	Y	N
32002	F	Lower (5/5)	Year 11	Edexcel IGCSE	20	20,1	Evolution_first	Genetics_first	Yes	Y	Y	N
32301	F	Lower (Double 2)	Year 10	OCR 21st C	23	23,1	Genetics_first	Genetics_first	Gap between of approx 3 months (different modules)	Y	Y	N
32302	F	Lower (Double 3)	Year 10	OCR 21st C	23	23,1	Genetics_first	Genetics_first	Gap between of approx 3 months (different modules)	Y	Y	N
32401	H	High (top set)	Year 10	OCR Gateway	24	24,1	Genetics_first	Genetics_first	No	Y	Y	N
32402	H	Higher (top core)	Year 10	OCR Gateway	24	24,2	Genetics_first	Genetics_first	No	Y	Y	N
32403	F	Low (lowest core)	Year 10	OCR Gateway	24	24,2	Genetics_first	Genetics_first	No	Y	Y	N
32501	H	Higher (top set)	Year 10	Edexcel	25	25,1	Evolution_first	Evolution_first	Yes	Y	Y	N
32502	H	Higher (2nd set)	Year 10	Edexcel	25	25,2	Evolution_first	Evolution_first	Yes	Y	Y	N
32503	H	Higher (top set)	Year 10	Edexcel	25	25,3	Evolution_first	Evolution_first	Yes	Y	Y	N
32504	H	Higher (2nd set)	Year 10	Edexcel	25	25,1	Evolution_first	Evolution_first	Yes	Y	Y	N
32701	H	Higher	Year 9	AQA	27	27,1	Genetics_first	Genetics_first	Yes	Y	Y	N
32702	H	Higher	Year 9	AQA	27	27,2	Genetics_first	Genetics_first	Yes	Y	Y	N
32703	F	Lower	Year 10	AQA	27	27,3	Genetics_first	Genetics_first	Yes	Y	Y	N
32704	F	Lower	Year 10	AQA	27	27,3	Genetics_first	Genetics_first	Yes	Y	Y	N
32801	H	Mixed - higher	Year 9	CIE IGCSE	28	28,1	Genetics_first	Genetics_first	Yes	Y	Y	N
32802	H	Mixed	Year 10	CIE IGCSE	28	28,2	Genetics_first	Genetics_first	No (most had covered genetics in KS3)	Y	Y	N
32803	H	Mixed - higher	Year 11	CIE IGCSE	28	28,2	Genetics_first	Genetics_first	Yes	Y	Y	N
32901	H	Top	Year 10	WJEC	29	29,1	Genetics_first	Genetics_first	Yes	Y	Y	N
32902	H	Top non-option set	Year 10	WJEC	29	29,1	Genetics_first	Genetics_first	Yes	Y	Y	N
33001	H	Top	Year 9	Edexcel	30	30,1	Genetics_first	Genetics_First	Yes	Y	Y	Y
33002	H	Top	Year 9	Edexcel	30	30,2	Genetics_first	Evolution_First	Yes	Y	Y	Y
33101	H	Mixed	Year 10	AQA IGCSE	31	31,1	Evolution_first	Evolution_first	Genetics - Year 10, evolution - Year 11	Y	Y	N
33102	F	Mixed - lower	Year 10	AQA IGCSE	31	31,2	Evolution_first	Evolution_first	Genetics - Year 10, evolution - Year 11	Y	Y	N
Notes
Class	Coded so that first digit refer to year of data collection, second two digits refer to a specific school and final two digits distinguish between classes within a school.
Ability	H = higher, F = foundation.
Set	Teacher description of class, which might include reference to ability order compared to other classes in school.
